# Supplementary material for: Structure elucidation of β-cyclodextrin–xylazine complex by a combination of quantitative 1H–1H ROESY and molecular dynamics studies
Source: publisher site journal article supplement (doi:10.3762/bjoc.9.226), 2013-09-23
Supplement: Additional file 1 [file S1.xls]

## Sheet: Sheet1
0.001	112.534	112.46	0.1
0.002	112.533	112.267	0.36
0.003	112.531	112.034	0.67
0.004	112.529	111.813	0.96
0.005	112.523	111.599	1.25
0.006	112.517	111.37	1.55
0.007	112.511	111.129	1.86
0.008	112.505	110.919	2.14
0.009	112.501	110.799	2.29
0.01	112.497	110.79	2.3
0.011	112.493	110.852	2.21
0.012	112.489	110.912	2.13
0.013	112.487	110.93	2.1
0.014	112.486	110.923	2.11
0.015	112.488	110.924	2.11
0.016	112.49	110.94	2.09
0.017	112.492	110.934	2.1
0.018	112.493	110.867	2.19
0.019	112.494	110.738	2.37
0.02	112.495	110.594	2.56
0.021	112.496	110.492	2.7
0.022	112.496	110.456	2.75
0.023	112.493	110.459	2.74
0.024	112.488	110.461	2.73
0.025	112.482	110.448	2.74
0.026	112.476	110.45	2.73
0.027	112.469	110.496	2.66
0.028	112.462	110.577	2.54
0.029	112.454	110.645	2.44
0.03	112.446	110.656	2.41
0.031	112.44	110.603	2.47
0.032	112.436	110.522	2.58
0.033	112.434	110.453	2.67
0.034	112.434	110.411	2.73
0.035	112.436	110.375	2.78
0.036	112.438	110.323	2.85
0.037	112.444	110.262	2.94
0.038	112.451	110.234	2.99
0.039	112.461	110.269	2.95
0.04	112.472	110.363	2.84
0.041	112.483	110.473	2.71
0.042	112.494	110.559	2.61
0.043	112.506	110.61	2.55
0.044	112.519	110.646	2.52
0.045	112.531	110.687	2.48
0.046	112.543	110.731	2.44
0.047	112.552	110.752	2.43
0.048	112.56	110.728	2.47
0.049	112.567	110.666	2.56
0.05	112.573	110.603	2.65
0.051	112.578	110.576	2.7
0.052	112.58	110.59	2.68
0.053	112.581	110.618	2.64
0.054	112.579	110.632	2.62
0.055	112.575	110.626	2.63
0.056	112.57	110.612	2.64
0.057	112.564	110.609	2.63
0.058	112.556	110.615	2.61
0.059	112.546	110.609	2.61
0.06	112.534	110.565	2.65
0.061	112.52	110.481	2.75
0.062	112.506	110.384	2.86
0.063	112.492	110.309	2.94
0.064	112.476	110.271	2.97
0.065	112.459	110.255	2.97
0.066	112.442	110.242	2.96
0.067	112.424	110.224	2.96
0.068	112.407	110.211	2.96
0.069	112.391	110.22	2.92
0.07	112.375	110.257	2.85
0.071	112.361	110.302	2.77
0.072	112.347	110.325	2.73
0.073	112.335	110.314	2.72
0.074	112.326	110.289	2.74
0.075	112.32	110.28	2.75
0.076	112.315	110.298	2.72
0.077	112.312	110.33	2.67
0.078	112.311	110.351	2.64
0.079	112.312	110.35	2.64
0.08	112.315	110.341	2.66
0.081	112.321	110.352	2.65
0.082	112.328	110.395	2.61
0.083	112.336	110.451	2.54
0.084	112.344	110.483	2.51
0.085	112.352	110.474	2.53
0.086	112.36	110.44	2.59
0.087	112.368	110.413	2.63
0.088	112.376	110.41	2.65
0.089	112.382	110.412	2.65
0.09	112.386	110.393	2.69
0.091	112.389	110.341	2.76
0.092	112.391	110.276	2.85
0.093	112.392	110.24	2.9
0.094	112.391	110.253	2.88
0.095	112.389	110.301	2.81
0.096	112.384	110.345	2.75
0.097	112.377	110.364	2.71
0.098	112.37	110.377	2.69
0.099	112.364	110.415	2.63
0.1	112.357	110.488	2.52
0.101	112.35	110.568	2.4
0.102	112.343	110.617	2.33
0.103	112.336	110.618	2.31
0.104	112.332	110.595	2.34
0.105	112.329	110.589	2.34
0.106	112.328	110.622	2.3
0.107	112.328	110.671	2.23
0.108	112.329	110.699	2.2
0.109	112.332	110.691	2.21
0.11	112.336	110.673	2.24
0.111	112.342	110.682	2.24
0.112	112.348	110.722	2.19
0.113	112.354	110.761	2.15
0.114	112.36	110.754	2.16
0.115	112.364	110.687	2.26
0.116	112.368	110.588	2.4
0.117	112.371	110.501	2.52
0.118	112.373	110.448	2.59
0.119	112.372	110.407	2.65
0.12	112.369	110.346	2.73
0.121	112.365	110.261	2.83
0.122	112.359	110.184	2.93
0.123	112.352	110.157	2.96
0.124	112.344	110.183	2.91
0.125	112.335	110.223	2.85
0.126	112.326	110.234	2.82
0.127	112.316	110.201	2.85
0.128	112.308	110.148	2.91
0.129	112.301	110.112	2.95
0.13	112.295	110.102	2.95
0.131	112.289	110.09	2.96
0.132	112.284	110.043	3.02
0.133	112.281	109.966	3.12
0.134	112.279	109.901	3.2
0.135	112.279	109.896	3.21
0.136	112.28	109.956	3.13
0.137	112.281	110.046	3.01
0.138	112.282	110.127	2.9
0.139	112.285	110.189	2.82
0.14	112.289	110.255	2.74
0.141	112.295	110.352	2.62
0.142	112.302	110.476	2.46
0.143	112.308	110.588	2.32
0.144	112.315	110.645	2.25
0.145	112.323	110.642	2.27
0.146	112.332	110.614	2.32
0.147	112.343	110.599	2.35
0.148	112.353	110.605	2.36
0.149	112.364	110.606	2.37
0.15	112.374	110.578	2.42
0.151	112.385	110.528	2.5
0.152	112.397	110.49	2.57
0.153	112.41	110.5	2.57
0.154	112.421	110.562	2.5
0.155	112.432	110.644	2.41
0.156	112.441	110.706	2.34
0.157	112.449	110.742	2.3
0.158	112.457	110.778	2.26
0.159	112.463	110.837	2.19
0.16	112.467	110.91	2.1
0.161	112.468	110.962	2.03
0.162	112.468	110.964	2.03
0.163	112.465	110.92	2.08
0.164	112.461	110.867	2.15
0.165	112.456	110.841	2.18
0.166	112.448	110.848	2.16
0.167	112.44	110.861	2.13
0.168	112.43	110.847	2.13
0.169	112.419	110.804	2.18
0.17	112.41	110.761	2.22
0.171	112.401	110.745	2.23
0.172	112.393	110.751	2.21
0.173	112.385	110.748	2.21
0.174	112.377	110.708	2.25
0.175	112.37	110.635	2.34
0.176	112.365	110.561	2.43
0.177	112.36	110.521	2.48
0.178	112.356	110.525	2.47
0.179	112.353	110.543	2.44
0.18	112.349	110.546	2.43
0.181	112.346	110.531	2.45
0.182	112.343	110.526	2.45
0.183	112.34	110.558	2.4
0.184	112.337	110.62	2.31
0.185	112.334	110.678	2.23
0.186	112.33	110.698	2.2
0.187	112.326	110.679	2.22
0.188	112.322	110.648	2.26
0.189	112.319	110.638	2.26
0.19	112.317	110.656	2.24
0.191	112.314	110.674	2.21
0.192	112.312	110.662	2.22
0.193	112.31	110.622	2.28
0.194	112.311	110.588	2.32
0.195	112.312	110.591	2.32
0.196	112.314	110.629	2.27
0.197	112.316	110.665	2.22
0.198	112.318	110.665	2.23
0.199	112.322	110.623	2.29
0.2	112.326	110.565	2.37
0.201	112.33	110.523	2.44
0.202	112.335	110.502	2.47
0.203	112.338	110.474	2.51
0.204	112.341	110.411	2.6
0.205	112.343	110.319	2.73
0.206	112.345	110.235	2.84
0.207	112.347	110.197	2.9
0.208	112.349	110.205	2.89
0.209	112.349	110.228	2.86
0.21	112.349	110.234	2.85
0.211	112.348	110.222	2.87
0.212	112.349	110.217	2.87
0.213	112.349	110.248	2.83
0.214	112.35	110.308	2.75
0.215	112.351	110.357	2.69
0.216	112.352	110.359	2.69
0.217	112.355	110.313	2.75
0.218	112.358	110.26	2.83
0.219	112.363	110.234	2.87
0.22	112.369	110.236	2.87
0.221	112.375	110.235	2.88
0.222	112.381	110.205	2.93
0.223	112.388	110.156	3.01
0.224	112.395	110.125	3.06
0.225	112.403	110.146	3.04
0.226	112.411	110.212	2.96
0.227	112.417	110.277	2.88
0.228	112.422	110.297	2.86
0.229	112.426	110.267	2.91
0.23	112.429	110.221	2.97
0.231	112.431	110.189	3.02
0.232	112.43	110.164	3.05
0.233	112.427	110.115	3.12
0.234	112.422	110.018	3.24
0.235	112.415	109.888	3.41
0.236	112.408	109.771	3.55
0.237	112.399	109.707	3.63
0.238	112.389	109.698	3.63
0.239	112.378	109.706	3.6
0.24	112.367	109.7	3.59
0.241	112.357	109.682	3.6
0.242	112.348	109.689	3.58
0.243	112.34	109.742	3.5
0.244	112.334	109.825	3.38
0.245	112.329	109.893	3.28
0.246	112.326	109.917	3.24
0.247	112.325	109.906	3.26
0.248	112.327	109.9	3.27
0.249	112.331	109.931	3.23
0.25	112.337	109.993	3.16
0.251	112.344	110.049	3.09
0.252	112.352	110.074	3.07
0.253	112.362	110.083	3.07
0.254	112.373	110.118	3.04
0.255	112.384	110.204	2.94
0.256	112.395	110.319	2.8
0.257	112.405	110.422	2.67
0.258	112.414	110.484	2.6
0.259	112.423	110.51	2.58
0.26	112.431	110.536	2.55
0.261	112.439	110.583	2.5
0.262	112.445	110.637	2.44
0.263	112.448	110.661	2.41
0.264	112.451	110.634	2.45
0.265	112.452	110.579	2.52
0.266	112.453	110.54	2.58
0.267	112.453	110.542	2.57
0.268	112.451	110.569	2.54
0.269	112.449	110.587	2.51
0.27	112.445	110.576	2.52
0.271	112.441	110.551	2.55
0.272	112.436	110.545	2.55
0.273	112.432	110.574	2.5
0.274	112.427	110.617	2.44
0.275	112.42	110.632	2.41
0.276	112.412	110.596	2.45
0.277	112.405	110.526	2.53
0.278	112.399	110.459	2.61
0.279	112.393	110.416	2.66
0.28	112.387	110.384	2.7
0.281	112.38	110.336	2.75
0.282	112.375	110.263	2.85
0.283	112.37	110.184	2.94
0.284	112.366	110.135	3.01
0.285	112.364	110.135	3
0.286	112.361	110.167	2.96
0.287	112.359	110.197	2.91
0.288	112.358	110.201	2.91
0.289	112.359	110.192	2.92
0.29	112.362	110.194	2.92
0.291	112.365	110.22	2.89
0.292	112.369	110.252	2.85
0.293	112.373	110.265	2.84
0.294	112.377	110.248	2.87
0.295	112.381	110.218	2.91
0.296	112.384	110.204	2.94
0.297	112.385	110.22	2.92
0.298	112.385	110.256	2.87
0.299	112.382	110.284	2.83
0.3	112.377	110.289	2.81
0.301	112.371	110.285	2.81
0.302	112.364	110.298	2.78
0.303	112.355	110.339	2.72
0.304	112.344	110.394	2.63
0.305	112.334	110.435	2.56
0.306	112.323	110.448	2.53
0.307	112.313	110.441	2.52
0.308	112.304	110.437	2.51
0.309	112.297	110.452	2.49
0.31	112.292	110.477	2.44
0.311	112.288	110.485	2.43
0.312	112.286	110.458	2.46
0.313	112.286	110.408	2.53
0.314	112.289	110.364	2.59
0.315	112.293	110.344	2.63
0.316	112.299	110.34	2.64
0.317	112.306	110.33	2.66
0.318	112.314	110.296	2.72
0.319	112.323	110.242	2.8
0.32	112.332	110.19	2.89
0.321	112.342	110.159	2.94
0.322	112.35	110.147	2.97
0.323	112.357	110.128	3
0.324	112.363	110.083	3.07
0.325	112.367	110.022	3.16
0.326	112.371	109.972	3.23
0.327	112.373	109.955	3.26
0.328	112.374	109.967	3.24
0.329	112.373	109.98	3.22
0.33	112.372	109.973	3.23
0.331	112.37	109.946	3.27
0.332	112.369	109.924	3.29
0.333	112.368	109.929	3.29
0.334	112.368	109.96	3.24
0.335	112.367	109.987	3.21
0.336	112.366	109.982	3.21
0.337	112.365	109.954	3.25
0.338	112.365	109.935	3.27
0.339	112.366	109.952	3.25
0.34	112.366	110.001	3.19
0.341	112.365	110.051	3.12
0.342	112.363	110.075	3.08
0.343	112.361	110.072	3.08
0.344	112.358	110.07	3.08
0.345	112.356	110.094	3.05
0.346	112.353	110.139	2.98
0.347	112.348	110.168	2.94
0.348	112.344	110.152	2.95
0.349	112.34	110.1	3.02
0.35	112.336	110.051	3.08
0.351	112.334	110.037	3.09
0.352	112.331	110.052	3.07
0.353	112.329	110.064	3.05
0.354	112.327	110.048	3.07
0.355	112.327	110.012	3.12
0.356	112.328	109.995	3.14
0.357	112.331	110.025	3.11
0.358	112.335	110.087	3.03
0.359	112.34	110.136	2.97
0.36	112.345	110.138	2.97
0.361	112.353	110.106	3.03
0.362	112.362	110.086	3.07
0.363	112.372	110.106	3.05
0.364	112.383	110.152	3.01
0.365	112.394	110.18	2.98
0.366	112.406	110.164	3.02
0.367	112.418	110.118	3.1
0.368	112.431	110.089	3.16
0.369	112.443	110.104	3.15
0.37	112.454	110.148	3.11
0.371	112.463	110.171	3.09
0.372	112.47	110.145	3.13
0.373	112.475	110.088	3.22
0.374	112.48	110.049	3.28
0.375	112.482	110.046	3.28
0.376	112.481	110.057	3.27
0.377	112.477	110.036	3.29
0.378	112.472	109.959	3.39
0.379	112.466	109.851	3.52
0.38	112.459	109.758	3.64
0.381	112.453	109.708	3.7
0.382	112.445	109.68	3.73
0.383	112.438	109.632	3.78
0.384	112.43	109.549	3.88
0.385	112.424	109.461	3.99
0.386	112.421	109.417	4.05
0.387	112.418	109.429	4.03
0.388	112.415	109.461	3.98
0.389	112.412	109.466	3.97
0.39	112.411	109.425	4.02
0.391	112.41	109.367	4.1
0.392	112.411	109.336	4.14
0.393	112.412	109.348	4.13
0.394	112.412	109.376	4.09
0.395	112.411	109.377	4.09
0.396	112.409	109.343	4.13
0.397	112.408	109.308	4.18
0.398	112.408	109.317	4.16
0.399	112.406	109.373	4.09
0.4	112.403	109.442	3.99
0.401	112.399	109.48	3.93
0.402	112.394	109.481	3.92
0.403	112.39	109.474	3.93
0.404	112.385	109.497	3.89
0.405	112.381	109.556	3.81
0.406	112.376	109.624	3.71
0.407	112.37	109.664	3.65
0.408	112.364	109.67	3.63
0.409	112.359	109.679	3.61
0.41	112.355	109.725	3.54
0.411	112.349	109.807	3.42
0.412	112.343	109.889	3.31
0.413	112.336	109.935	3.23
0.414	112.329	109.94	3.22
0.415	112.321	109.931	3.22
0.416	112.314	109.938	3.2
0.417	112.306	109.966	3.15
0.418	112.299	109.988	3.11
0.419	112.29	109.974	3.12
0.42	112.284	109.925	3.18
0.421	112.279	109.874	3.24
0.422	112.275	109.856	3.26
0.423	112.274	109.871	3.24
0.424	112.274	109.891	3.21
0.425	112.276	109.891	3.21
0.426	112.28	109.864	3.25
0.427	112.287	109.832	3.31
0.428	112.297	109.817	3.34
0.429	112.308	109.822	3.35
0.43	112.32	109.825	3.36
0.431	112.334	109.799	3.41
0.432	112.347	109.746	3.5
0.433	112.361	109.693	3.6
0.434	112.375	109.666	3.65
0.435	112.388	109.669	3.66
0.436	112.398	109.679	3.66
0.437	112.406	109.674	3.68
0.438	112.413	109.652	3.72
0.439	112.418	109.631	3.75
0.44	112.421	109.635	3.75
0.441	112.421	109.669	3.71
0.442	112.419	109.714	3.65
0.443	112.414	109.742	3.6
0.444	112.407	109.747	3.58
0.445	112.399	109.753	3.56
0.446	112.389	109.784	3.51
0.447	112.378	109.844	3.41
0.448	112.366	109.914	3.3
0.449	112.354	109.969	3.21
0.45	112.343	110.004	3.15
0.451	112.333	110.034	3.1
0.452	112.324	110.085	3.02
0.453	112.317	110.167	2.9
0.454	112.311	110.259	2.77
0.455	112.307	110.329	2.66
0.456	112.303	110.359	2.62
0.457	112.302	110.361	2.61
0.458	112.302	110.358	2.62
0.459	112.302	110.353	2.63
0.46	112.303	110.332	2.66
0.461	112.304	110.271	2.74
0.462	112.305	110.167	2.88
0.463	112.306	110.047	3.04
0.464	112.308	109.948	3.18
0.465	112.31	109.892	3.26
0.466	112.311	109.866	3.29
0.467	112.313	109.843	3.33
0.468	112.314	109.808	3.38
0.469	112.316	109.779	3.42
0.47	112.319	109.781	3.42
0.471	112.321	109.814	3.38
0.472	112.323	109.849	3.33
0.473	112.324	109.85	3.33
0.474	112.325	109.804	3.4
0.475	112.326	109.728	3.5
0.476	112.327	109.658	3.6
0.477	112.327	109.612	3.66
0.478	112.325	109.576	3.7
0.479	112.323	109.519	3.78
0.48	112.319	109.438	3.88
0.481	112.315	109.362	3.98
0.482	112.31	109.326	4.02
0.483	112.305	109.339	4
0.484	112.298	109.374	3.94
0.485	112.289	109.394	3.9
0.486	112.28	109.383	3.9
0.487	112.271	109.36	3.92
0.488	112.261	109.351	3.92
0.489	112.252	109.363	3.89
0.49	112.242	109.366	3.88
0.491	112.232	109.321	3.92
0.492	112.222	109.224	4.04
0.493	112.214	109.109	4.18
0.494	112.207	109.019	4.3
0.495	112.201	108.964	4.36
0.496	112.195	108.922	4.41
0.497	112.19	108.868	4.48
0.498	112.186	108.8	4.56
0.499	112.184	108.75	4.63
0.5	112.183	108.753	4.62
0.501	112.183	108.812	4.54
0.502	112.182	108.892	4.43
0.503	112.181	108.95	4.35
0.504	112.18	108.972	4.32
0.505	112.179	108.984	4.3
0.506	112.177	109.015	4.26
0.507	112.175	109.065	4.19
0.508	112.172	109.105	4.13
0.509	112.168	109.106	4.12
0.51	112.163	109.073	4.16
0.511	112.158	109.035	4.21
0.512	112.153	109.03	4.21
0.513	112.148	109.064	4.16
0.514	112.141	109.105	4.09
0.515	112.135	109.118	4.06
0.516	112.129	109.101	4.08
0.517	112.126	109.077	4.11
0.518	112.123	109.073	4.11
0.519	112.122	109.084	4.09
0.52	112.123	109.079	4.1
0.521	112.124	109.037	4.16
0.522	112.128	108.964	4.26
0.523	112.133	108.895	4.36
0.524	112.141	108.865	4.41
0.525	112.15	108.877	4.41
0.526	112.16	108.906	4.38
0.527	112.17	108.922	4.38
0.528	112.181	108.926	4.39
0.529	112.194	108.946	4.38
0.53	112.208	109.005	4.32
0.531	112.222	109.092	4.22
0.532	112.236	109.172	4.13
0.533	112.25	109.215	4.09
0.534	112.264	109.22	4.1
0.535	112.278	109.212	4.13
0.536	112.292	109.216	4.14
0.537	112.305	109.233	4.14
0.538	112.316	109.234	4.15
0.539	112.326	109.192	4.22
0.54	112.335	109.11	4.35
0.541	112.344	109.021	4.48
0.542	112.352	108.954	4.58
0.543	112.358	108.907	4.65
0.544	112.363	108.858	4.72
0.545	112.367	108.784	4.83
0.546	112.37	108.69	4.96
0.547	112.373	108.604	5.08
0.548	112.376	108.555	5.15
0.549	112.379	108.544	5.17
0.55	112.379	108.546	5.16
0.551	112.38	108.536	5.18
0.552	112.379	108.515	5.21
0.553	112.378	108.512	5.21
0.554	112.376	108.554	5.15
0.555	112.372	108.636	5.03
0.556	112.366	108.727	4.9
0.557	112.359	108.797	4.8
0.558	112.351	108.84	4.73
0.559	112.342	108.873	4.67
0.56	112.334	108.919	4.6
0.561	112.325	108.975	4.51
0.562	112.317	109.016	4.45
0.563	112.309	109.012	4.44
0.564	112.302	108.967	4.49
0.565	112.298	108.913	4.56
0.566	112.296	108.884	4.6
0.567	112.296	108.883	4.6
0.568	112.297	108.891	4.59
0.569	112.301	108.884	4.6
0.57	112.306	108.863	4.64
0.571	112.313	108.851	4.67
0.572	112.322	108.869	4.65
0.573	112.332	108.915	4.6
0.574	112.341	108.953	4.56
0.575	112.35	108.952	4.58
0.576	112.36	108.909	4.65
0.577	112.369	108.855	4.73
0.578	112.379	108.818	4.8
0.579	112.388	108.798	4.84
0.58	112.396	108.772	4.88
0.581	112.403	108.718	4.97
0.582	112.41	108.643	5.08
0.583	112.417	108.578	5.17
0.584	112.424	108.555	5.21
0.585	112.43	108.572	5.2
0.586	112.434	108.597	5.17
0.587	112.437	108.593	5.18
0.588	112.441	108.56	5.23
0.589	112.444	108.531	5.27
0.59	112.447	108.534	5.27
0.591	112.45	108.566	5.23
0.592	112.453	108.599	5.19
0.593	112.455	108.606	5.18
0.594	112.457	108.592	5.21
0.595	112.459	108.587	5.22
0.596	112.461	108.621	5.17
0.597	112.463	108.688	5.09
0.598	112.464	108.752	5
0.599	112.463	108.774	4.97
0.6	112.462	108.756	4.99
0.601	112.462	108.73	5.03
0.602	112.461	108.723	5.04
0.603	112.459	108.727	5.03
0.604	112.456	108.713	5.04
0.605	112.453	108.66	5.11
0.606	112.449	108.581	5.21
0.607	112.446	108.517	5.29
0.608	112.444	108.501	5.31
0.609	112.441	108.534	5.26
0.61	112.438	108.58	5.2
0.611	112.434	108.61	5.15
0.612	112.431	108.632	5.12
0.613	112.427	108.68	5.05
0.614	112.423	108.773	4.92
0.615	112.418	108.893	4.75
0.616	112.41	108.993	4.6
0.617	112.401	109.042	4.53
0.618	112.391	109.041	4.51
0.619	112.381	109.026	4.52
0.62	112.37	109.025	4.51
0.621	112.358	109.034	4.48
0.622	112.345	109.02	4.48
0.623	112.332	108.964	4.54
0.624	112.32	108.887	4.63
0.625	112.311	108.834	4.68
0.626	112.302	108.831	4.68
0.627	112.294	108.863	4.62
0.628	112.288	108.888	4.58
0.629	112.283	108.882	4.58
0.63	112.281	108.85	4.62
0.631	112.282	108.827	4.66
0.632	112.286	108.831	4.65
0.633	112.291	108.849	4.64
0.634	112.298	108.843	4.65
0.635	112.307	108.795	4.73
0.636	112.318	108.727	4.84
0.637	112.331	108.683	4.92
0.638	112.346	108.686	4.93
0.639	112.36	108.719	4.91
0.64	112.375	108.746	4.89
0.641	112.389	108.743	4.91
0.642	112.403	108.723	4.96
0.643	112.417	108.716	4.99
0.644	112.43	108.738	4.97
0.645	112.441	108.769	4.95
0.646	112.45	108.77	4.96
0.647	112.457	108.72	5.04
0.648	112.463	108.641	5.15
0.649	112.468	108.573	5.25
0.65	112.472	108.537	5.3
0.651	112.472	108.519	5.33
0.652	112.471	108.487	5.37
0.653	112.467	108.43	5.44
0.654	112.462	108.364	5.52
0.655	112.456	108.317	5.58
0.656	112.448	108.301	5.59
0.657	112.439	108.294	5.59
0.658	112.428	108.256	5.62
0.659	112.417	108.174	5.72
0.66	112.406	108.067	5.85
0.661	112.395	107.973	5.96
0.662	112.385	107.905	6.04
0.663	112.374	107.848	6.1
0.664	112.364	107.776	6.18
0.665	112.354	107.685	6.29
0.666	112.346	107.598	6.4
0.667	112.338	107.547	6.46
0.668	112.332	107.545	6.45
0.669	112.326	107.571	6.41
0.67	112.32	107.593	6.37
0.671	112.314	107.594	6.36
0.672	112.309	107.592	6.36
0.673	112.304	107.611	6.32
0.674	112.3	107.655	6.26
0.675	112.295	107.702	6.19
0.676	112.29	107.722	6.15
0.677	112.285	107.706	6.17
0.678	112.28	107.669	6.21
0.679	112.276	107.641	6.24
0.68	112.271	107.636	6.24
0.681	112.267	107.644	6.23
0.682	112.262	107.642	6.22
0.683	112.257	107.622	6.25
0.684	112.254	107.6	6.27
0.685	112.251	107.597	6.27
0.686	112.248	107.614	6.24
0.687	112.245	107.628	6.22
0.688	112.243	107.611	6.24
0.689	112.241	107.554	6.32
0.69	112.24	107.47	6.43
0.691	112.24	107.384	6.54
0.692	112.241	107.316	6.64
0.693	112.241	107.262	6.71
0.694	112.242	107.21	6.78
0.695	112.241	107.158	6.85
0.696	112.242	107.126	6.89
0.697	112.242	107.138	6.88
0.698	112.242	107.202	6.79
0.699	112.241	107.296	6.66
0.7	112.241	107.392	6.53
0.701	112.24	107.468	6.43
0.702	112.239	107.522	6.36
0.703	112.238	107.566	6.29
0.704	112.238	107.61	6.23
0.705	112.237	107.642	6.19
0.706	112.237	107.641	6.19
0.707	112.236	107.595	6.25
0.708	112.236	107.523	6.35
0.709	112.237	107.454	6.44
0.71	112.237	107.407	6.51
0.711	112.238	107.382	6.54
0.712	112.237	107.363	6.57
0.713	112.237	107.339	6.6
0.714	112.235	107.318	6.62
0.715	112.234	107.321	6.62
0.716	112.231	107.362	6.56
0.717	112.227	107.428	6.47
0.718	112.222	107.486	6.38
0.719	112.215	107.513	6.33
0.72	112.208	107.514	6.32
0.721	112.2	107.515	6.31
0.722	112.192	107.532	6.28
0.723	112.183	107.558	6.23
0.724	112.174	107.569	6.2
0.725	112.164	107.548	6.22
0.726	112.154	107.506	6.26
0.727	112.147	107.474	6.3
0.728	112.14	107.477	6.28
0.729	112.135	107.51	6.23
0.73	112.129	107.537	6.19
0.731	112.125	107.535	6.18
0.732	112.122	107.51	6.21
0.733	112.122	107.49	6.24
0.734	112.123	107.494	6.24
0.735	112.124	107.507	6.22
0.736	112.126	107.497	6.24
0.737	112.13	107.441	6.32
0.738	112.134	107.352	6.44
0.739	112.141	107.266	6.57
0.74	112.149	107.214	6.65
0.741	112.158	107.186	6.7
0.742	112.168	107.15	6.76
0.743	112.179	107.085	6.86
0.744	112.192	107.01	6.98
0.745	112.207	106.963	7.07
0.746	112.223	106.96	7.09
0.747	112.24	106.98	7.09
0.748	112.257	106.982	7.11
0.749	112.275	106.948	7.18
0.75	112.293	106.898	7.27
0.751	112.312	106.873	7.33
0.752	112.331	106.898	7.32
0.753	112.347	106.954	7.27
0.754	112.36	107	7.22
0.755	112.371	107.017	7.21
0.756	112.381	107.03	7.21
0.757	112.389	107.075	7.16
0.758	112.394	107.16	7.05
0.759	112.396	107.253	6.93
0.76	112.395	107.31	6.85
0.761	112.392	107.314	6.84
0.762	112.388	107.293	6.87
0.763	112.383	107.286	6.87
0.764	112.377	107.308	6.83
0.765	112.369	107.334	6.78
0.766	112.36	107.323	6.79
0.767	112.35	107.266	6.85
0.768	112.342	107.196	6.93
0.769	112.334	107.154	6.98
0.77	112.326	107.144	6.98
0.771	112.319	107.131	6.99
0.772	112.311	107.079	7.05
0.773	112.306	106.986	7.17
0.774	112.3	106.881	7.3
0.775	112.297	106.806	7.4
0.776	112.295	106.767	7.45
0.777	112.293	106.732	7.49
0.778	112.292	106.666	7.58
0.779	112.293	106.572	7.71
0.78	112.296	106.489	7.82
0.781	112.301	106.456	7.87
0.782	112.307	106.471	7.86
0.783	112.313	106.501	7.83
0.784	112.319	106.515	7.82
0.785	112.326	106.514	7.83
0.786	112.334	106.525	7.83
0.787	112.341	106.572	7.77
0.788	112.348	106.646	7.68
0.789	112.353	106.709	7.6
0.79	112.357	106.727	7.59
0.791	112.361	106.703	7.62
0.792	112.364	106.67	7.67
0.793	112.366	106.652	7.7
0.794	112.367	106.644	7.71
0.795	112.367	106.616	7.75
0.796	112.365	106.555	7.83
0.797	112.363	106.472	7.94
0.798	112.361	106.404	8.03
0.799	112.359	106.374	8.06
0.8	112.357	106.377	8.06
0.801	112.354	106.386	8.04
0.802	112.351	106.378	8.05
0.803	112.349	106.359	8.07
0.804	112.347	106.356	8.07
0.805	112.347	106.384	8.03
0.806	112.347	106.428	7.98
0.807	112.349	106.46	7.93
0.808	112.351	106.466	7.93
0.809	112.355	106.454	7.95
0.81	112.36	106.45	7.96
0.811	112.366	106.473	7.94
0.812	112.373	106.518	7.89
0.813	112.38	106.562	7.84
0.814	112.386	106.586	7.81
0.815	112.393	106.593	7.81
0.816	112.399	106.6	7.81
0.817	112.405	106.619	7.8
0.818	112.409	106.64	7.77
0.819	112.411	106.646	7.77
0.82	112.412	106.625	7.8
0.821	112.412	106.583	7.85
0.822	112.409	106.54	7.91
0.823	112.405	106.513	7.94
0.824	112.399	106.5	7.95
0.825	112.391	106.484	7.96
0.826	112.381	106.448	7.99
0.827	112.369	106.393	8.05
0.828	112.356	106.337	8.11
0.829	112.342	106.293	8.15
0.83	112.327	106.26	8.17
0.831	112.31	106.223	8.2
0.832	112.293	106.167	8.25
0.833	112.274	106.096	8.32
0.834	112.256	106.025	8.4
0.835	112.238	105.972	8.44
0.836	112.22	105.939	8.46
0.837	112.204	105.909	8.48
0.838	112.188	105.861	8.52
0.839	112.175	105.793	8.6
0.84	112.166	105.724	8.68
0.841	112.159	105.674	8.74
0.842	112.156	105.647	8.77
0.843	112.157	105.627	8.8
0.844	112.161	105.596	8.84
0.845	112.168	105.551	8.92
0.846	112.18	105.505	8.99
0.847	112.196	105.478	9.05
0.848	112.216	105.471	9.09
0.849	112.238	105.463	9.13
0.85	112.262	105.43	9.21
0.851	112.288	105.372	9.32
0.852	112.317	105.311	9.44
0.853	112.346	105.274	9.53
0.854	112.374	105.262	9.58
0.855	112.401	105.256	9.63
0.856	112.426	105.237	9.69
0.857	112.448	105.204	9.76
0.858	112.468	105.179	9.82
0.859	112.484	105.187	9.83
0.86	112.497	105.228	9.79
0.861	112.505	105.275	9.74
0.862	112.509	105.302	9.71
0.863	112.51	105.308	9.7
0.864	112.507	105.316	9.69
0.865	112.503	105.35	9.64
0.866	112.496	105.406	9.55
0.867	112.487	105.457	9.47
0.868	112.476	105.479	9.43
0.869	112.466	105.476	9.42
0.87	112.455	105.473	9.41
0.871	112.445	105.493	9.37
0.872	112.434	105.534	9.3
0.873	112.424	105.571	9.23
0.874	112.414	105.578	9.21
0.875	112.404	105.562	9.22
0.876	112.396	105.549	9.22
0.877	112.389	105.56	9.2
0.878	112.382	105.585	9.16
0.879	112.376	105.597	9.13
0.88	112.37	105.579	9.15
0.881	112.366	105.54	9.2
0.882	112.362	105.507	9.24
0.883	112.36	105.496	9.25
0.884	112.358	105.498	9.24
0.885	112.355	105.485	9.26
0.886	112.354	105.439	9.32
0.887	112.353	105.377	9.4
0.888	112.353	105.33	9.46
0.889	112.354	105.318	9.48
0.89	112.354	105.327	9.47
0.891	112.354	105.336	9.46
0.892	112.354	105.331	9.46
0.893	112.354	105.327	9.47
0.894	112.353	105.343	9.44
0.895	112.352	105.388	9.38
0.896	112.349	105.444	9.3
0.897	112.347	105.481	9.25
0.898	112.343	105.484	9.24
0.899	112.341	105.468	9.26
0.9	112.339	105.457	9.27
0.901	112.337	105.466	9.26
0.902	112.335	105.483	9.23
0.903	112.333	105.491	9.22
0.904	112.332	105.486	9.22
0.905	112.331	105.484	9.23
0.906	112.331	105.502	9.2
0.907	112.332	105.545	9.14
0.908	112.333	105.599	9.07
0.909	112.335	105.641	9.02
0.91	112.338	105.663	8.99
0.911	112.341	105.677	8.98
0.912	112.346	105.701	8.95
0.913	112.352	105.737	8.91
0.914	112.358	105.77	8.87
0.915	112.363	105.784	8.86
0.916	112.369	105.775	8.89
0.917	112.375	105.75	8.93
0.918	112.381	105.727	8.97
0.919	112.387	105.711	8.99
0.92	112.392	105.699	9.02
0.921	112.397	105.681	9.05
0.922	112.401	105.653	9.09
0.923	112.404	105.624	9.14
0.924	112.408	105.609	9.16
0.925	112.411	105.614	9.16
0.926	112.414	105.629	9.14
0.927	112.417	105.642	9.13
0.928	112.419	105.645	9.13
0.929	112.422	105.638	9.14
0.93	112.424	105.629	9.16
0.931	112.426	105.624	9.16
0.932	112.426	105.624	9.16
0.933	112.424	105.617	9.17
0.934	112.42	105.596	9.19
0.935	112.414	105.562	9.23
0.936	112.405	105.528	9.27
0.937	112.394	105.502	9.29
0.938	112.381	105.484	9.29
0.939	112.365	105.465	9.3
0.94	112.348	105.438	9.31
0.941	112.329	105.402	9.33
0.942	112.31	105.368	9.35
0.943	112.292	105.346	9.36
0.944	112.274	105.337	9.35
0.945	112.258	105.33	9.33
0.946	112.243	105.31	9.34
0.947	112.232	105.275	9.37
0.948	112.224	105.239	9.41
0.949	112.22	105.216	9.44
0.95	112.22	105.206	9.45
0.951	112.223	105.197	9.47
0.952	112.231	105.173	9.51
0.953	112.242	105.131	9.58
0.954	112.258	105.082	9.67
0.955	112.277	105.044	9.75
0.956	112.3	105.021	9.81
0.957	112.325	105.001	9.87
0.958	112.353	104.97	9.95
0.959	112.382	104.933	10.04
0.96	112.412	104.909	10.11
0.961	112.443	104.916	10.14
0.962	112.473	104.955	10.13
0.963	112.501	105.005	10.1
0.964	112.526	105.047	10.08
0.965	112.549	105.075	10.07
0.966	112.568	105.098	10.06
0.967	112.585	105.13	10.04
0.968	112.597	105.168	10.01
0.969	112.605	105.193	9.99
0.97	112.61	105.189	10
0.971	112.611	105.163	10.03
0.972	112.61	105.142	10.06
0.973	112.607	105.144	10.05
0.974	112.601	105.168	10.01
0.975	112.594	105.194	9.97
0.976	112.585	105.204	9.94
0.977	112.575	105.2	9.94
0.978	112.566	105.2	9.92
0.979	112.556	105.222	9.88
0.98	112.547	105.263	9.81
0.981	112.537	105.303	9.75
0.982	112.528	105.323	9.71
0.983	112.521	105.332	9.69
0.984	112.515	105.351	9.65
0.985	112.512	105.398	9.58
0.986	112.51	105.464	9.49
0.987	112.51	105.527	9.41
0.988	112.512	105.57	9.35
0.989	112.516	105.598	9.32
0.99	112.522	105.629	9.29
0.991	112.53	105.678	9.23
0.992	112.537	105.74	9.16
0.993	112.545	105.794	9.1
0.994	112.551	105.822	9.07
0.995	112.556	105.831	9.06
0.996	112.56	105.839	9.06
0.997	112.563	105.859	9.03
0.998	112.563	105.878	9.01
0.999	112.561	105.877	9.01
1	112.558	105.843	9.05
1.001	112.553	105.784	9.12
1.002	112.549	105.721	9.2
1.003	112.542	105.67	9.26
1.004	112.537	105.631	9.3
1.005	112.531	105.586	9.36
1.006	112.526	105.526	9.43
1.007	112.522	105.462	9.51
1.008	112.519	105.421	9.56
1.009	112.516	105.416	9.56
1.01	112.512	105.439	9.53
1.011	112.508	105.468	9.48
1.012	112.503	105.492	9.45
1.013	112.498	105.514	9.41
1.014	112.493	105.549	9.36
1.015	112.488	105.603	9.28
1.016	112.483	105.667	9.18
1.017	112.478	105.718	9.11
1.018	112.474	105.744	9.07
1.019	112.472	105.756	9.05
1.02	112.471	105.774	9.02
1.021	112.47	105.808	8.98
1.022	112.47	105.847	8.92
1.023	112.472	105.874	8.89
1.024	112.474	105.883	8.88
1.025	112.477	105.885	8.88
1.026	112.482	105.899	8.87
1.027	112.487	105.937	8.82
1.028	112.492	105.992	8.76
1.029	112.497	106.045	8.69
1.03	112.502	106.084	8.65
1.031	112.507	106.119	8.61
1.032	112.512	106.166	8.55
1.033	112.516	106.229	8.47
1.034	112.519	106.296	8.38
1.035	112.52	106.348	8.32
1.036	112.519	106.378	8.27
1.037	112.517	106.394	8.25
1.038	112.513	106.413	8.22
1.039	112.505	106.45	8.16
1.04	112.496	106.501	8.08
1.041	112.483	106.553	7.99
1.042	112.468	106.596	7.91
1.043	112.451	106.636	7.83
1.044	112.434	106.685	7.75
1.045	112.416	106.746	7.64
1.046	112.398	106.81	7.53
1.047	112.381	106.868	7.43
1.048	112.366	106.91	7.35
1.049	112.352	106.939	7.29
1.05	112.34	106.968	7.24
1.051	112.331	107.008	7.17
1.052	112.324	107.059	7.09
1.053	112.319	107.106	7.02
1.054	112.316	107.134	6.98
1.055	112.315	107.141	6.97
1.056	112.317	107.136	6.98
1.057	112.321	107.126	7
1.058	112.326	107.11	7.03
1.059	112.333	107.082	7.08
1.06	112.342	107.031	7.15
1.061	112.351	106.963	7.26
1.062	112.362	106.897	7.36
1.063	112.374	106.859	7.43
1.064	112.386	106.859	7.45
1.065	112.399	106.89	7.42
1.066	112.411	106.934	7.38
1.067	112.423	106.99	7.32
1.068	112.434	107.07	7.23
1.069	112.445	107.183	7.09
1.07	112.455	107.324	6.91
1.071	112.464	107.467	6.73
1.072	112.47	107.583	6.58
1.073	112.475	107.661	6.49
1.074	112.48	107.714	6.42
1.075	112.483	107.762	6.36
1.076	112.484	107.807	6.3
1.077	112.484	107.83	6.27
1.078	112.482	107.812	6.29
1.079	112.478	107.762	6.35
1.08	112.474	107.713	6.41
1.081	112.469	107.695	6.43
1.082	112.463	107.709	6.41
1.083	112.456	107.734	6.36
1.084	112.448	107.748	6.33
1.085	112.44	107.754	6.31
1.086	112.433	107.78	6.27
1.087	112.427	107.846	6.17
1.088	112.421	107.944	6.03
1.089	112.417	108.035	5.9
1.09	112.413	108.088	5.83
1.091	112.412	108.108	5.8
1.092	112.411	108.121	5.78
1.093	112.412	108.151	5.74
1.094	112.414	108.188	5.69
1.095	112.415	108.204	5.67
1.096	112.417	108.184	5.7
1.097	112.419	108.142	5.76
1.098	112.422	108.115	5.8
1.099	112.426	108.125	5.8
1.1	112.43	108.161	5.75
1.101	112.433	108.186	5.72
1.102	112.436	108.175	5.74
1.103	112.439	108.136	5.8
1.104	112.442	108.095	5.86
1.105	112.445	108.068	5.9
1.106	112.447	108.038	5.94
1.107	112.446	107.975	6.02
1.108	112.445	107.864	6.17
1.109	112.442	107.729	6.35
1.11	112.439	107.608	6.51
1.111	112.435	107.526	6.61
1.112	112.43	107.473	6.68
1.113	112.425	107.414	6.75
1.114	112.419	107.336	6.85
1.115	112.415	107.256	6.95
1.116	112.41	107.209	7.01
1.117	112.406	107.208	7
1.118	112.401	107.229	6.97
1.119	112.395	107.235	6.95
1.12	112.39	107.211	6.98
1.121	112.384	107.176	7.02
1.122	112.38	107.161	7.03
1.123	112.377	107.179	7
1.124	112.374	107.205	6.96
1.125	112.372	107.202	6.97
1.126	112.373	107.159	7.02
1.127	112.376	107.105	7.1
1.128	112.382	107.08	7.14
1.129	112.391	107.092	7.14
1.13	112.4	107.118	7.12
1.131	112.41	107.128	7.12
1.132	112.422	107.12	7.14
1.133	112.434	107.12	7.16
1.134	112.447	107.156	7.13
1.135	112.459	107.229	7.05
1.136	112.47	107.301	6.96
1.137	112.479	107.335	6.93
1.138	112.488	107.326	6.96
1.139	112.497	107.306	6.99
1.14	112.505	107.303	7.01
1.141	112.511	107.315	7
1.142	112.516	107.312	7.01
1.143	112.518	107.271	7.07
1.144	112.519	107.197	7.17
1.145	112.518	107.123	7.27
1.146	112.516	107.074	7.33
1.147	112.51	107.046	7.36
1.148	112.502	107.013	7.4
1.149	112.492	106.954	7.46
1.15	112.481	106.875	7.55
1.151	112.469	106.81	7.63
1.152	112.457	106.78	7.65
1.153	112.445	106.78	7.63
1.154	112.434	106.784	7.61
1.155	112.424	106.776	7.61
1.156	112.416	106.763	7.62
1.157	112.41	106.765	7.61
1.158	112.408	106.789	7.57
1.159	112.407	106.822	7.53
1.16	112.409	106.835	7.51
1.161	112.412	106.808	7.55
1.162	112.418	106.745	7.64
1.163	112.425	106.671	7.75
1.164	112.434	106.605	7.85
1.165	112.444	106.547	7.95
1.166	112.453	106.484	8.04
1.167	112.463	106.414	8.15
1.168	112.472	106.353	8.24
1.169	112.481	106.324	8.3
1.17	112.488	106.338	8.29
1.171	112.495	106.388	8.23
1.172	112.499	106.451	8.15
1.173	112.503	106.503	8.08
1.174	112.505	106.539	8.04
1.175	112.507	106.568	8
1.176	112.507	106.598	7.96
1.177	112.507	106.621	7.93
1.178	112.507	106.622	7.93
1.179	112.505	106.593	7.97
1.18	112.504	106.543	8.03
1.181	112.502	106.491	8.1
1.182	112.5	106.453	8.15
1.183	112.497	106.43	8.18
1.184	112.494	106.409	8.2
1.185	112.491	106.379	8.24
1.186	112.488	106.342	8.28
1.187	112.486	106.313	8.32
1.188	112.483	106.302	8.33
1.189	112.481	106.301	8.33
1.19	112.48	106.29	8.34
1.191	112.479	106.257	8.38
1.192	112.48	106.203	8.46
1.193	112.481	106.139	8.55
1.194	112.484	106.078	8.63
1.195	112.488	106.021	8.71
1.196	112.492	105.957	8.8
1.197	112.496	105.878	8.92
1.198	112.5	105.791	9.04
1.199	112.504	105.713	9.15
1.2	112.507	105.657	9.23
1.201	112.509	105.619	9.28
1.202	112.51	105.584	9.33
1.203	112.509	105.537	9.39
1.204	112.507	105.474	9.48
1.205	112.505	105.404	9.57
1.206	112.502	105.34	9.65
1.207	112.498	105.287	9.72
1.208	112.495	105.239	9.78
1.209	112.49	105.184	9.84
1.21	112.486	105.127	9.92
1.211	112.483	105.081	9.97
1.212	112.48	105.06	10
1.213	112.478	105.062	9.99
1.214	112.476	105.073	9.97
1.215	112.475	105.077	9.97
1.216	112.475	105.066	9.98
1.217	112.475	105.045	10.01
1.218	112.476	105.026	10.04
1.219	112.477	105.012	10.06
1.22	112.478	104.991	10.09
1.221	112.479	104.949	10.14
1.222	112.479	104.885	10.23
1.223	112.478	104.817	10.32
1.224	112.478	104.764	10.39
1.225	112.477	104.73	10.44
1.226	112.475	104.703	10.47
1.227	112.474	104.667	10.52
1.228	112.472	104.617	10.58
1.229	112.471	104.561	10.66
1.23	112.47	104.513	10.72
1.231	112.47	104.475	10.77
1.232	112.469	104.43	10.83
1.233	112.469	104.364	10.92
1.234	112.468	104.275	11.04
1.235	112.468	104.184	11.16
1.236	112.467	104.113	11.26
1.237	112.466	104.065	11.32
1.238	112.465	104.027	11.37
1.239	112.463	103.987	11.42
1.24	112.461	103.944	11.48
1.241	112.459	103.91	11.52
1.242	112.458	103.898	11.53
1.243	112.457	103.904	11.52
1.244	112.455	103.906	11.52
1.245	112.454	103.885	11.54
1.246	112.452	103.84	11.6
1.247	112.451	103.786	11.67
1.248	112.448	103.733	11.74
1.249	112.445	103.676	11.81
1.25	112.439	103.6	11.91
1.251	112.433	103.492	12.05
1.252	112.425	103.36	12.21
1.253	112.416	103.223	12.39
1.254	112.407	103.101	12.54
1.255	112.396	103.002	12.66
1.256	112.386	102.917	12.76
1.257	112.375	102.839	12.85
1.258	112.364	102.768	12.93
1.259	112.354	102.715	12.99
1.26	112.346	102.687	13.01
1.261	112.338	102.672	13.02
1.262	112.33	102.652	13.04
1.263	112.324	102.611	13.09
1.264	112.319	102.544	13.17
1.265	112.316	102.46	13.28
1.266	112.314	102.374	13.39
1.267	112.313	102.294	13.5
1.268	112.313	102.221	13.6
1.269	112.315	102.149	13.7
1.27	112.318	102.081	13.79
1.271	112.323	102.027	13.87
1.272	112.329	101.995	13.92
1.273	112.336	101.982	13.95
1.274	112.344	101.976	13.97
1.275	112.352	101.961	14
1.276	112.36	101.928	14.06
1.277	112.368	101.88	14.13
1.278	112.377	101.831	14.21
1.279	112.385	101.79	14.28
1.28	112.392	101.755	14.33
1.281	112.399	101.717	14.39
1.282	112.405	101.669	14.47
1.283	112.411	101.621	14.54
1.284	112.416	101.588	14.59
1.285	112.421	101.574	14.61
1.286	112.425	101.571	14.62
1.287	112.427	101.558	14.64
1.288	112.428	101.522	14.69
1.289	112.427	101.467	14.77
1.29	112.426	101.414	14.84
1.291	112.423	101.376	14.88
1.292	112.419	101.347	14.92
1.293	112.414	101.311	14.96
1.294	112.408	101.262	15.02
1.295	112.403	101.217	15.07
1.296	112.399	101.198	15.09
1.297	112.395	101.216	15.06
1.298	112.392	101.256	15
1.299	112.389	101.293	14.95
1.3	112.388	101.31	14.92
1.301	112.387	101.315	14.92
1.302	112.387	101.325	14.9
1.303	112.388	101.343	14.88
1.304	112.389	101.347	14.88
1.305	112.39	101.305	14.94
1.306	112.392	101.211	15.06
1.307	112.394	101.089	15.23
1.308	112.396	100.972	15.39
1.309	112.399	100.873	15.53
1.31	112.402	100.783	15.65
1.311	112.404	100.685	15.79
1.312	112.407	100.584	15.93
1.313	112.41	100.507	16.04
1.314	112.413	100.486	16.07
1.315	112.415	100.523	16.02
1.316	112.417	100.586	15.94
1.317	112.416	100.636	15.87
1.318	112.416	100.664	15.83
1.319	112.414	100.689	15.8
1.32	112.412	100.729	15.74
1.321	112.409	100.774	15.68
1.322	112.406	100.798	15.64
1.323	112.401	100.782	15.65
1.324	112.396	100.741	15.7
1.325	112.392	100.713	15.73
1.326	112.387	100.731	15.71
1.327	112.382	100.789	15.62
1.328	112.376	100.859	15.52
1.329	112.37	100.915	15.43
1.33	112.365	100.963	15.36
1.331	112.36	101.024	15.27
1.332	112.356	101.099	15.17
1.333	112.352	101.163	15.08
1.334	112.349	101.178	15.05
1.335	112.347	101.128	15.12
1.336	112.347	101.036	15.24
1.337	112.35	100.942	15.37
1.338	112.354	100.87	15.47
1.339	112.358	100.815	15.55
1.34	112.363	100.758	15.64
1.341	112.369	100.7	15.72
1.342	112.376	100.668	15.77
1.343	112.382	100.694	15.75
1.344	112.389	100.777	15.65
1.345	112.395	100.889	15.5
1.346	112.401	100.995	15.37
1.347	112.405	101.083	15.25
1.348	112.41	101.167	15.15
1.349	112.415	101.264	15.02
1.35	112.419	101.371	14.89
1.351	112.421	101.457	14.77
1.352	112.423	101.498	14.72
1.353	112.424	101.495	14.73
1.354	112.426	101.479	14.75
1.355	112.427	101.472	14.76
1.356	112.426	101.476	14.75
1.357	112.424	101.472	14.76
1.358	112.421	101.445	14.79
1.359	112.417	101.405	14.84
1.36	112.412	101.377	14.87
1.361	112.406	101.379	14.86
1.362	112.4	101.402	14.82
1.363	112.392	101.417	14.79
1.364	112.384	101.403	14.79
1.365	112.377	101.368	14.83
1.366	112.371	101.332	14.87
1.367	112.366	101.31	14.9
1.368	112.362	101.294	14.91
1.369	112.358	101.267	14.94
1.37	112.356	101.223	15
1.371	112.357	101.179	15.06
1.372	112.358	101.159	15.09
1.373	112.361	101.178	15.07
1.374	112.364	101.225	15.01
1.375	112.367	101.275	14.95
1.376	112.37	101.313	14.9
1.377	112.373	101.348	14.85
1.378	112.375	101.393	14.8
1.379	112.376	101.449	14.72
1.38	112.377	101.5	14.66
1.381	112.377	101.525	14.62
1.382	112.377	101.522	14.63
1.383	112.378	101.506	14.65
1.384	112.38	101.499	14.66
1.385	112.382	101.511	14.65
1.386	112.385	101.529	14.63
1.387	112.388	101.535	14.62
1.388	112.391	101.524	14.64
1.389	112.394	101.512	14.66
1.39	112.398	101.512	14.67
1.391	112.401	101.523	14.66
1.392	112.403	101.528	14.65
1.393	112.404	101.513	14.67
1.394	112.404	101.479	14.72
1.395	112.403	101.444	14.76
1.396	112.402	101.43	14.78
1.397	112.4	101.439	14.77
1.398	112.397	101.458	14.74
1.399	112.394	101.469	14.72
1.4	112.391	101.473	14.71
1.401	112.389	101.486	14.69
1.402	112.388	101.516	14.65
1.403	112.387	101.56	14.59
1.404	112.386	101.597	14.54
1.405	112.386	101.613	14.51
1.406	112.386	101.614	14.51
1.407	112.387	101.615	14.51
1.408	112.389	101.634	14.49
1.409	112.391	101.666	14.45
1.41	112.393	101.692	14.42
1.411	112.395	101.697	14.41
1.412	112.397	101.687	14.43
1.413	112.4	101.682	14.44
1.414	112.403	101.692	14.43
1.415	112.405	101.71	14.41
1.416	112.407	101.721	14.4
1.417	112.408	101.716	14.41
1.418	112.409	101.706	14.42
1.419	112.409	101.71	14.41
1.42	112.408	101.739	14.37
1.421	112.407	101.78	14.32
1.422	112.404	101.811	14.27
1.423	112.4	101.823	14.25
1.424	112.395	101.831	14.23
1.425	112.39	101.852	14.2
1.426	112.384	101.891	14.14
1.427	112.377	101.936	14.07
1.428	112.37	101.972	14.01
1.429	112.362	102.001	13.96
1.43	112.355	102.039	13.9
1.431	112.349	102.102	13.81
1.432	112.344	102.19	13.68
1.433	112.338	102.283	13.55
1.434	112.332	102.361	13.44
1.435	112.328	102.422	13.35
1.436	112.324	102.486	13.26
1.437	112.321	102.564	13.14
1.438	112.318	102.655	13.02
1.439	112.315	102.742	12.9
1.44	112.313	102.82	12.79
1.441	112.312	102.894	12.69
1.442	112.312	102.984	12.57
1.443	112.313	103.103	12.41
1.444	112.315	103.242	12.22
1.445	112.317	103.381	12.04
1.446	112.32	103.505	11.88
1.447	112.323	103.62	11.73
1.448	112.326	103.739	11.57
1.449	112.329	103.867	11.4
1.45	112.332	103.992	11.24
1.451	112.333	104.102	11.09
1.452	112.334	104.192	10.97
1.453	112.334	104.274	10.86
1.454	112.334	104.366	10.73
1.455	112.333	104.482	10.58
1.456	112.332	104.613	10.4
1.457	112.331	104.739	10.23
1.458	112.329	104.85	10.08
1.459	112.328	104.956	9.93
1.46	112.328	105.073	9.77
1.461	112.328	105.2	9.6
1.462	112.328	105.322	9.44
1.463	112.329	105.417	9.31
1.464	112.33	105.48	9.23
1.465	112.331	105.526	9.17
1.466	112.332	105.58	9.1
1.467	112.334	105.654	9
1.468	112.333	105.731	8.9
1.469	112.332	105.789	8.82
1.47	112.33	105.825	8.76
1.471	112.328	105.862	8.71
1.472	112.326	105.921	8.63
1.473	112.324	105.997	8.52
1.474	112.322	106.065	8.43
1.475	112.32	106.102	8.38
1.476	112.32	106.112	8.36
1.477	112.322	106.121	8.35
1.478	112.326	106.15	8.32
1.479	112.332	106.195	8.27
1.48	112.34	106.227	8.24
1.481	112.349	106.23	8.24
1.482	112.36	106.221	8.27
1.483	112.373	106.238	8.27
1.484	112.386	106.299	8.2
1.485	112.399	106.388	8.1
1.486	112.41	106.475	8
1.487	112.422	106.549	7.91
1.488	112.432	106.624	7.82
1.489	112.442	106.728	7.7
1.49	112.45	106.863	7.53
1.491	112.457	106.998	7.36
1.492	112.461	107.093	7.23
1.493	112.465	107.144	7.17
1.494	112.467	107.181	7.12
1.495	112.468	107.235	7.05
1.496	112.468	107.305	6.96
1.497	112.465	107.366	6.87
1.498	112.462	107.4	6.82
1.499	112.458	107.418	6.79
1.5	112.454	107.452	6.74
1.501	112.452	107.525	6.64
1.502	112.45	107.624	6.5
1.503	112.448	107.712	6.38
1.504	112.448	107.763	6.31
1.505	112.449	107.787	6.28
1.506	112.453	107.818	6.24
1.507	112.458	107.872	6.18
1.508	112.463	107.931	6.11
1.509	112.469	107.966	6.07
1.51	112.474	107.966	6.07
1.511	112.48	107.954	6.1
1.512	112.485	107.967	6.09
1.513	112.491	108.021	6.02
1.514	112.495	108.091	5.93
1.515	112.498	108.142	5.87
1.516	112.499	108.164	5.84
1.517	112.501	108.183	5.82
1.518	112.502	108.235	5.75
1.519	112.503	108.32	5.63
1.52	112.502	108.408	5.51
1.521	112.499	108.468	5.43
1.522	112.497	108.501	5.38
1.523	112.495	108.54	5.33
1.524	112.494	108.615	5.23
1.525	112.492	108.718	5.08
1.526	112.489	108.806	4.96
1.527	112.486	108.847	4.9
1.528	112.484	108.85	4.9
1.529	112.482	108.853	4.89
1.53	112.481	108.878	4.85
1.531	112.478	108.905	4.81
1.532	112.475	108.894	4.82
1.533	112.471	108.831	4.9
1.534	112.467	108.743	5.02
1.535	112.464	108.678	5.1
1.536	112.46	108.656	5.13
1.537	112.456	108.652	5.13
1.538	112.451	108.627	5.15
1.539	112.446	108.579	5.21
1.54	112.443	108.543	5.26
1.541	112.442	108.558	5.23
1.542	112.441	108.62	5.15
1.543	112.44	108.69	5.05
1.544	112.44	108.731	5
1.545	112.441	108.746	4.98
1.546	112.442	108.768	4.95
1.547	112.445	108.82	4.88
1.548	112.447	108.88	4.8
1.549	112.447	108.906	4.77
1.55	112.446	108.877	4.81
1.551	112.446	108.817	4.89
1.552	112.446	108.772	4.95
1.553	112.445	108.761	4.96
1.554	112.444	108.766	4.96
1.555	112.442	108.757	4.97
1.556	112.44	108.732	5
1.557	112.439	108.719	5.01
1.558	112.44	108.744	4.98
1.559	112.442	108.803	4.9
1.56	112.444	108.856	4.83
1.561	112.447	108.865	4.83
1.562	112.452	108.829	4.88
1.563	112.459	108.778	4.96
1.564	112.468	108.729	5.04
1.565	112.476	108.673	5.12
1.566	112.485	108.585	5.25
1.567	112.493	108.459	5.43
1.568	112.5	108.317	5.64
1.569	112.507	108.191	5.81
1.57	112.512	108.094	5.95
1.571	112.515	108.006	6.07
1.572	112.515	107.9	6.22
1.573	112.514	107.773	6.39
1.574	112.512	107.648	6.55
1.575	112.509	107.547	6.69
1.576	112.505	107.465	6.79
1.577	112.499	107.378	6.9
1.578	112.493	107.272	7.03
1.579	112.486	107.156	7.18
1.58	112.481	107.055	7.31
1.581	112.474	106.981	7.4
1.582	112.467	106.926	7.47
1.583	112.461	106.861	7.54
1.584	112.455	106.776	7.65
1.585	112.451	106.687	7.77
1.586	112.448	106.618	7.85
1.587	112.446	106.573	7.91
1.588	112.444	106.529	7.97
1.589	112.443	106.465	8.05
1.59	112.442	106.382	8.17
1.591	112.442	106.302	8.27
1.592	112.442	106.246	8.35
1.593	112.441	106.205	8.4
1.594	112.438	106.154	8.47
1.595	112.433	106.073	8.57
1.596	112.429	105.977	8.69
1.597	112.424	105.896	8.8
1.598	112.419	105.845	8.86
1.599	112.414	105.805	8.9
1.6	112.408	105.753	8.97
1.601	112.403	105.684	9.05
1.602	112.4	105.624	9.13
1.603	112.397	105.6	9.16
1.604	112.395	105.617	9.13
1.605	112.394	105.647	9.09
1.606	112.392	105.659	9.07
1.607	112.391	105.651	9.08
1.608	112.39	105.654	9.08
1.609	112.39	105.686	9.03
1.61	112.389	105.735	8.96
1.611	112.387	105.763	8.92
1.612	112.385	105.751	8.94
1.613	112.383	105.712	8.99
1.614	112.383	105.684	9.03
1.615	112.385	105.684	9.03
1.616	112.387	105.69	9.02
1.617	112.39	105.663	9.06
1.618	112.394	105.594	9.16
1.619	112.401	105.516	9.28
1.62	112.411	105.466	9.36
1.621	112.42	105.45	9.39
1.622	112.429	105.438	9.42
1.623	112.437	105.398	9.48
1.624	112.444	105.336	9.58
1.625	112.45	105.288	9.65
1.626	112.455	105.281	9.66
1.627	112.457	105.305	9.63
1.628	112.456	105.316	9.62
1.629	112.453	105.282	9.66
1.63	112.448	105.219	9.74
1.631	112.444	105.167	9.8
1.632	112.438	105.146	9.82
1.633	112.43	105.136	9.83
1.634	112.42	105.101	9.86
1.635	112.408	105.028	9.94
1.636	112.396	104.947	10.04
1.637	112.382	104.896	10.09
1.638	112.368	104.885	10.08
1.639	112.352	104.881	10.07
1.64	112.335	104.839	10.1
1.641	112.318	104.753	10.19
1.642	112.303	104.658	10.3
1.643	112.289	104.59	10.37
1.644	112.277	104.548	10.41
1.645	112.266	104.498	10.47
1.646	112.257	104.411	10.57
1.647	112.251	104.296	10.72
1.648	112.247	104.193	10.85
1.649	112.247	104.132	10.93
1.65	112.249	104.099	10.98
1.651	112.253	104.053	11.05
1.652	112.258	103.965	11.17
1.653	112.266	103.853	11.34
1.654	112.276	103.76	11.47
1.655	112.289	103.705	11.56
1.656	112.302	103.668	11.63
1.657	112.316	103.611	11.73
1.658	112.332	103.524	11.87
1.659	112.349	103.432	12.01
1.66	112.368	103.374	12.12
1.661	112.388	103.359	12.16
1.662	112.407	103.36	12.19
1.663	112.426	103.337	12.25
1.664	112.444	103.279	12.35
1.665	112.462	103.217	12.46
1.666	112.48	103.181	12.53
1.667	112.495	103.171	12.56
1.668	112.509	103.151	12.61
1.669	112.52	103.09	12.71
1.67	112.529	102.99	12.85
1.671	112.538	102.882	13.01
1.672	112.544	102.794	13.14
1.673	112.549	102.724	13.24
1.674	112.552	102.64	13.35
1.675	112.553	102.518	13.52
1.676	112.553	102.368	13.72
1.677	112.553	102.227	13.91
1.678	112.553	102.119	14.06
1.679	112.553	102.034	14.17
1.68	112.552	101.942	14.29
1.681	112.551	101.832	14.44
1.682	112.551	101.719	14.6
1.683	112.552	101.633	14.71
1.684	112.554	101.594	14.77
1.685	112.556	101.585	14.78
1.686	112.558	101.575	14.8
1.687	112.561	101.545	14.84
1.688	112.564	101.512	14.89
1.689	112.567	101.505	14.9
1.69	112.571	101.532	14.87
1.691	112.574	101.569	14.83
1.692	112.577	101.589	14.8
1.693	112.579	101.582	14.82
1.694	112.581	101.564	14.84
1.695	112.583	101.559	14.85
1.696	112.585	101.573	14.84
1.697	112.585	101.587	14.82
1.698	112.584	101.574	14.83
1.699	112.582	101.533	14.89
1.7	112.581	101.487	14.95
1.701	112.578	101.464	14.97
1.702	112.575	101.471	14.96
1.703	112.57	101.488	14.93
1.704	112.565	101.5	14.91
1.705	112.559	101.504	14.9
1.706	112.553	101.515	14.87
1.707	112.547	101.55	14.82
1.708	112.541	101.605	14.73
1.709	112.534	101.656	14.66
1.71	112.527	101.678	14.62
1.711	112.52	101.672	14.62
1.712	112.514	101.66	14.62
1.713	112.509	101.665	14.61
1.714	112.504	101.686	14.58
1.715	112.5	101.709	14.54
1.716	112.497	101.723	14.52
1.717	112.496	101.736	14.5
1.718	112.498	101.764	14.46
1.719	112.502	101.823	14.39
1.72	112.508	101.907	14.28
1.721	112.517	101.99	14.18
1.722	112.529	102.051	14.12
1.723	112.545	102.09	14.09
1.724	112.563	102.127	14.06
1.725	112.584	102.175	14.02
1.726	112.606	102.226	13.99
1.727	112.63	102.264	13.97
1.728	112.654	102.28	13.98
1.729	112.678	102.28	14.01
1.73	112.701	102.283	14.04
1.731	112.723	102.305	14.04
1.732	112.742	102.341	14.01
1.733	112.757	102.369	14
1.734	112.769	102.377	14
1.735	112.775	102.369	14.02
1.736	112.777	102.363	14.03
1.737	112.773	102.369	14.02
1.738	112.764	102.381	13.99
1.739	112.749	102.381	13.97
1.74	112.728	102.36	13.97
1.741	112.703	102.326	13.98
1.742	112.674	102.302	13.97
1.743	112.642	102.303	13.93
1.744	112.606	102.326	13.85
1.745	112.569	102.352	13.76
1.746	112.529	102.368	13.69
1.747	112.489	102.38	13.62
1.748	112.45	102.408	13.53
1.749	112.411	102.46	13.41
1.75	112.374	102.524	13.27
1.751	112.338	102.581	13.15
1.752	112.305	102.616	13.05
1.753	112.274	102.632	12.99
1.754	112.248	102.646	12.94
1.755	112.225	102.667	12.88
1.756	112.207	102.686	12.83
1.757	112.194	102.684	12.81
1.758	112.186	102.652	12.85
1.759	112.183	102.603	12.91
1.76	112.186	102.562	12.97
1.761	112.194	102.542	13
1.762	112.205	102.539	13.02
1.763	112.219	102.537	13.05
1.764	112.237	102.53	13.08
1.765	112.255	102.525	13.11
1.766	112.274	102.539	13.12
1.767	112.292	102.581	13.08
1.768	112.308	102.637	13.03
1.769	112.322	102.686	12.98
1.77	112.333	102.716	12.96
1.771	112.342	102.742	12.94
1.772	112.35	102.785	12.89
1.773	112.356	102.857	12.8
1.774	112.361	102.946	12.68
1.775	112.366	103.034	12.57
1.776	112.371	103.11	12.48
1.777	112.379	103.183	12.39
1.778	112.389	103.27	12.29
1.779	112.401	103.377	12.16
1.78	112.415	103.49	12.02
1.781	112.429	103.584	11.92
1.782	112.444	103.65	11.85
1.783	112.458	103.703	11.8
1.784	112.469	103.766	11.73
1.785	112.477	103.845	11.63
1.786	112.48	103.925	11.53
1.787	112.477	103.983	11.44
1.788	112.469	104.01	11.4
1.789	112.455	104.017	11.37
1.79	112.436	104.026	11.33
1.791	112.414	104.046	11.27
1.792	112.388	104.062	11.22
1.793	112.36	104.053	11.19
1.794	112.332	104.019	11.2
1.795	112.306	103.984	11.21
1.796	112.283	103.977	11.19
1.797	112.265	104.007	11.13
1.798	112.251	104.056	11.04
1.799	112.243	104.106	10.96
1.8	112.242	104.149	10.9
1.801	112.247	104.2	10.84
1.802	112.259	104.279	10.75
1.803	112.274	104.385	10.63
1.804	112.291	104.492	10.51
1.805	112.32	104.583	10.42
1.806	112.343	104.633	10.39
1.807	112.366	104.666	10.37
1.808	112.387	104.699	10.36
1.809	112.404	104.73	10.34
1.81	112.415	104.737	10.34
1.811	112.42	104.702	10.4
1.812	112.42	104.626	10.5
1.813	112.415	104.534	10.62
1.814	112.405	104.454	10.71
1.815	112.391	104.395	10.77
1.816	112.375	104.343	10.82
1.817	112.358	104.281	10.88
1.818	112.344	104.216	10.95
1.819	112.333	104.176	10.99
1.82	112.329	104.18	10.98
1.821	112.332	104.223	10.93
1.822	112.343	104.279	10.86
1.823	112.363	104.326	10.83
1.824	112.393	104.361	10.82
1.825	112.434	104.401	10.82
1.826	112.484	104.463	10.81
1.827	112.542	104.544	10.78
1.828	112.606	104.62	10.76
1.829	112.675	104.672	10.78
1.83	112.748	104.708	10.83
1.831	112.823	104.752	10.87
1.832	112.896	104.822	10.88
1.833	112.966	104.911	10.85
1.834	113.03	104.996	10.82
1.835	113.086	105.054	10.82
1.836	113.133	105.083	10.85
1.837	113.17	105.096	10.88
1.838	113.195	105.106	10.9
1.839	113.208	105.106	10.92
1.84	113.209	105.074	10.96
1.841	113.198	104.995	11.05
1.842	113.177	104.879	11.18
1.843	113.146	104.756	11.3
1.844	113.108	104.649	11.4
1.845	113.062	104.557	11.46
1.846	113.011	104.466	11.51
1.847	112.957	104.364	11.58
1.848	112.9	104.259	11.64
1.849	112.843	104.175	11.68
1.85	112.787	104.129	11.66
1.851	112.731	104.118	11.6
1.852	112.676	104.118	11.53
1.853	112.623	104.111	11.47
1.854	112.572	104.104	11.41
1.855	112.525	104.119	11.33
1.856	112.48	104.169	11.2
1.857	112.439	104.245	11.04
1.858	112.4	104.318	10.89
1.859	112.365	104.369	10.77
1.86	112.334	104.399	10.69
1.861	112.308	104.43	10.61
1.862	112.286	104.477	10.52
1.863	112.268	104.536	10.42
1.864	112.254	104.581	10.34
1.865	112.243	104.595	10.3
1.866	112.237	104.59	10.3
1.867	112.235	104.59	10.3
1.868	112.237	104.614	10.27
1.869	112.243	104.653	10.23
1.87	112.251	104.681	10.2
1.871	112.262	104.683	10.21
1.872	112.277	104.67	10.25
1.873	112.294	104.668	10.27
1.874	112.314	104.698	10.26
1.875	112.336	104.752	10.22
1.876	112.36	104.801	10.18
1.877	112.385	104.829	10.18
1.878	112.412	104.845	10.2
1.879	112.441	104.874	10.2
1.88	112.472	104.926	10.17
1.881	112.505	104.986	10.13
1.882	112.538	105.023	10.12
1.883	112.571	105.024	10.17
1.884	112.606	105.001	10.25
1.885	112.64	104.983	10.32
1.886	112.673	104.988	10.35
1.887	112.703	105.005	10.37
1.888	112.729	105.011	10.4
1.889	112.752	104.994	10.45
1.89	112.773	104.967	10.52
1.891	112.79	104.954	10.56
1.892	112.804	104.961	10.57
1.893	112.815	104.968	10.57
1.894	112.823	104.947	10.61
1.895	112.829	104.887	10.7
1.896	112.834	104.802	10.82
1.897	112.837	104.719	10.94
1.898	112.84	104.652	11.03
1.899	112.84	104.591	11.11
1.9	112.84	104.521	11.21
1.901	112.838	104.439	11.32
1.902	112.836	104.364	11.41
1.903	112.833	104.324	11.46
1.904	112.829	104.323	11.46
1.905	112.824	104.343	11.43
1.906	112.817	104.359	11.4
1.907	112.809	104.361	11.38
1.908	112.801	104.358	11.38
1.909	112.792	104.367	11.35
1.91	112.781	104.391	11.3
1.911	112.769	104.421	11.25
1.912	112.755	104.435	11.21
1.913	112.739	104.427	11.2
1.914	112.723	104.41	11.2
1.915	112.706	104.405	11.18
1.916	112.689	104.414	11.15
1.917	112.673	104.424	11.11
1.918	112.657	104.416	11.1
1.919	112.644	104.381	11.13
1.92	112.632	104.329	11.19
1.921	112.623	104.278	11.24
1.922	112.616	104.241	11.28
1.923	112.612	104.215	11.31
1.924	112.61	104.184	11.35
1.925	112.61	104.139	11.41
1.926	112.613	104.091	11.48
1.927	112.618	104.058	11.53
1.928	112.626	104.052	11.55
1.929	112.637	104.066	11.55
1.93	112.65	104.084	11.54
1.931	112.665	104.093	11.55
1.932	112.683	104.1	11.56
1.933	112.704	104.13	11.55
1.934	112.727	104.199	11.49
1.935	112.754	104.302	11.39
1.936	112.784	104.415	11.28
1.937	112.817	104.517	11.18
1.938	112.854	104.614	11.1
1.939	112.894	104.724	11.01
1.94	112.937	104.86	10.88
1.941	112.981	105.008	10.74
1.942	113.023	105.14	10.62
1.943	113.063	105.234	10.55
1.944	113.099	105.294	10.52
1.945	113.129	105.346	10.49
1.946	113.152	105.404	10.44
1.947	113.165	105.453	10.39
1.948	113.166	105.459	10.38
1.949	113.158	105.4	10.45
1.95	113.141	105.293	10.57
1.951	113.116	105.173	10.7
1.952	113.084	105.065	10.8
1.953	113.046	104.962	10.89
1.954	113.004	104.841	11
1.955	112.962	104.701	11.13
1.956	112.92	104.567	11.25
1.957	112.88	104.483	11.31
1.958	112.844	104.465	11.29
1.959	112.811	104.49	11.21
1.96	112.781	104.518	11.13
1.961	112.756	104.529	11.09
1.962	112.737	104.54	11.04
1.963	112.722	104.579	10.97
1.964	112.71	104.648	10.86
1.965	112.702	104.713	10.76
1.966	112.696	104.737	10.72
1.967	112.693	104.715	10.75
1.968	112.693	104.672	10.81
1.969	112.696	104.644	10.85
1.97	112.7	104.64	10.86
1.971	112.705	104.633	10.88
1.972	112.711	104.59	10.94
1.973	112.717	104.509	11.06
1.974	112.725	104.418	11.19
1.975	112.733	104.345	11.3
1.976	112.74	104.287	11.39
1.977	112.748	104.218	11.49
1.978	112.754	104.114	11.64
1.979	112.761	103.982	11.83
1.98	112.769	103.856	12.01
1.981	112.777	103.764	12.14
1.982	112.785	103.709	12.23
1.983	112.794	103.669	12.29
1.984	112.803	103.622	12.37
1.985	112.813	103.572	12.45
1.986	112.824	103.541	12.51
1.987	112.836	103.544	12.52
1.988	112.849	103.57	12.5
1.989	112.862	103.587	12.5
1.99	112.875	103.573	12.53
1.991	112.888	103.527	12.61
1.992	112.902	103.47	12.71
1.993	112.916	103.419	12.8
1.994	112.93	103.375	12.87
1.995	112.942	103.317	12.97
1.996	112.953	103.23	13.1
1.997	112.964	103.117	13.27
1.998	112.973	103	13.44
1.999	112.981	102.902	13.58
2	112.987	102.826	13.69
[truncated: 2,000 more rows]
